# Supplementary material for: Self-Adaptive Solution-Space Reduction Algorithm for Multi-Objective Evolutionary Design Optimization of Water Distribution Networks
Source: Springer Nature journal article supplement (doi:10.1007/s11269-018-1994-5), 2018-05-13
Supplement: MOESM1 [file 15760562]

# WATER RESOURCES MANAGEMENT

## **Self-Adaptive Solution-Space Reduction Algorithm for Multi-Objective Evolutionary Design Optimization of Water Distribution Networks**

Tiku T. Tanyimboh<sup>a,b\*</sup> and Anna Czajkowska<sup>b,c</sup>

Tiku T. Tanyimboh, PhD<sup>a,b</sup> (\*Corresponding author)

<sup>a</sup> School of Civil and Environmental Engineering, University of the Witwatersrand, Johannesburg, Private Bag 3, WITS 2050, South Africa

<sup>b</sup> Department of Civil and Environmental Engineering, University of Strathclyde, Glasgow, 75 Montrose Street, Glasgow G1 1XJ, UK

Email: tiku.tanyimboh@wits.ac.za; Telephone: +27 (0)11 717 7105

ORCID ID: <https://orcid.org/0000-0003-3741-7689>

Anna Czajkowska, PhD<sup>b,c</sup>

<sup>b</sup> Department of Civil and Environmental Engineering, University of Strathclyde, Glasgow, 75 Montrose Street, Glasgow G1 1XJ, UK

<sup>c</sup> RPS Group, Merchantile Building, 53 Bothwell Street, Glasgow G2 6TS, UK

Email: anna.czajkowska.civeng@gmail.com

Cite this article as: Tanyimboh TT, Czajkowska AM (2018) Self-Adaptive Solution-Space Reduction Algorithm for Multi-Objective Evolutionary Design Optimization of Water Distribution Networks. *Water Resources Management*, DOI: 10.1007/s11269-018-1994-5

Funding: This project was funded by the UK Engineering and Physical Sciences Research Council (EPSRC) (EPSRC Grant Number EP/G055564/1).

## **SUPPLEMENTARY DATA**

### **Pareto-Optimal Fronts of the Individual Optimization Runs**

The initial populations used in the four solution scenarios were identical. Thus, the four Pareto-optimal fronts in each chart had the same initial population. The Pareto-optimal fronts for the 50 independent optimization runs revealed that, in general, the new methodology with solution-space reduction achieved superior results compared to the conventional solution approach with the full solution space. It was also evident that the conventional approach with the full solution space provided more solutions with high entropies and high costs than the reduced solution spaces.

The four solution scenarios were as follows: (a) Full solution space with entropy maximization (FSS) (full solution space); (b) Reduced solution space with entropy maximization (100% MERSS) (maximum entropy reduced solution space); (c) Reduced solution space based on 99% of the maximum entropy value (99% MERSS); and (d) Reduced solution space based on 98% of the maximum entropy value (98% MERSS). FSS and MERSS stand for full solution space and maximum entropy reduced solution space, respectively.

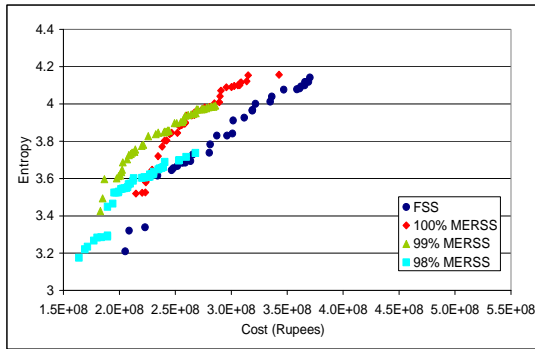

Run 1

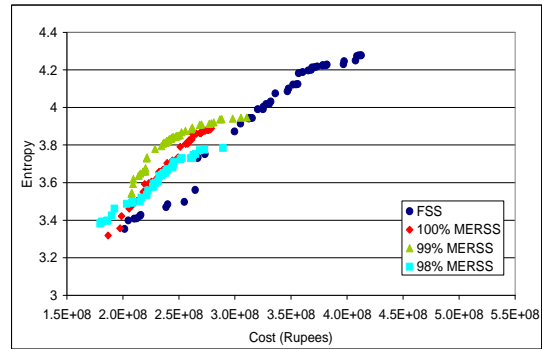

Run 2

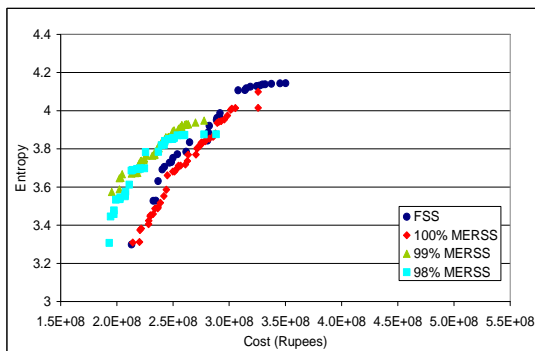

Run 3

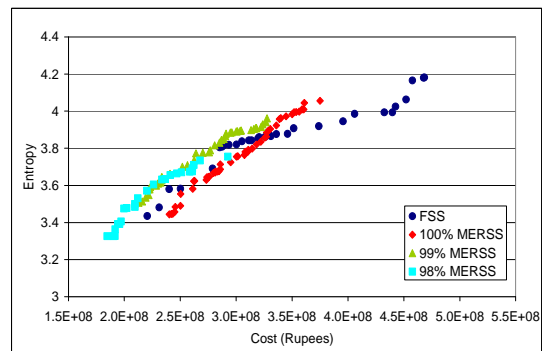

Run 4

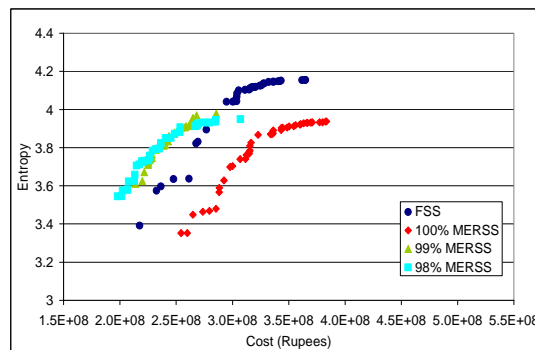

Run 5

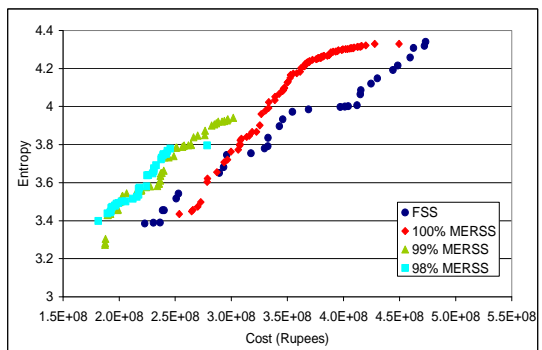

Run 6

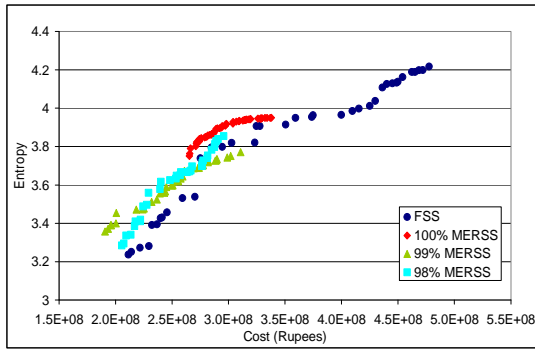

Run 7

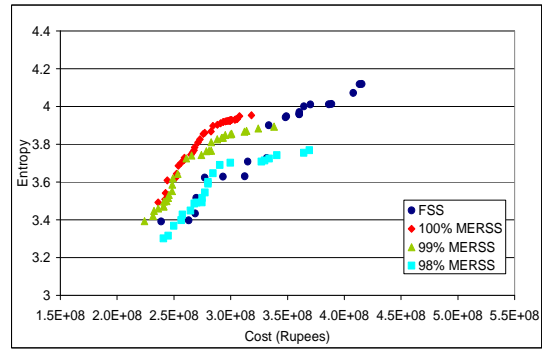

Run 8

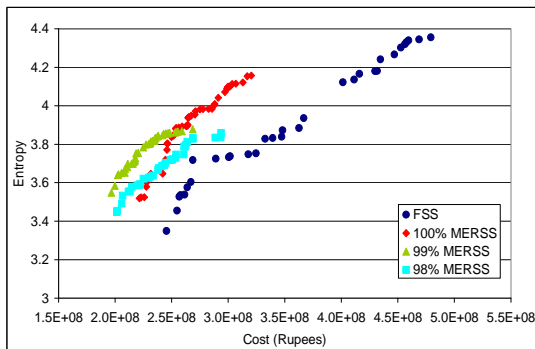

Run 9

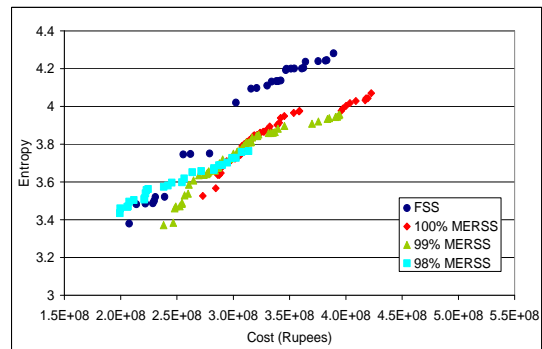

Run 10

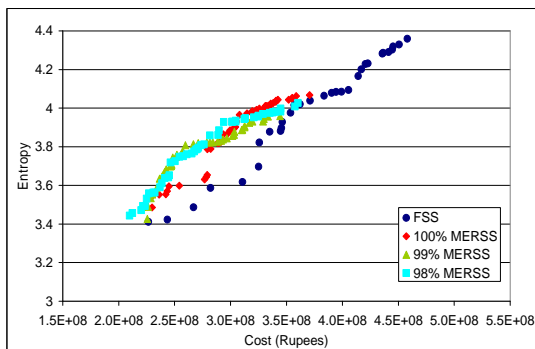

Run 11

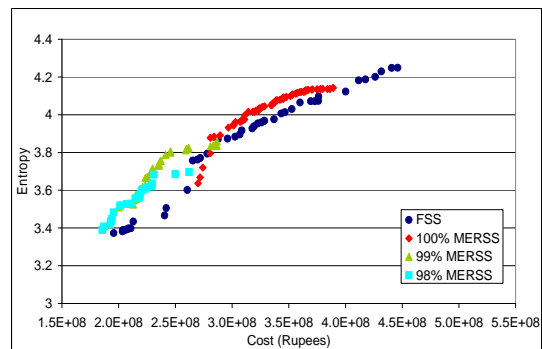

Run 12

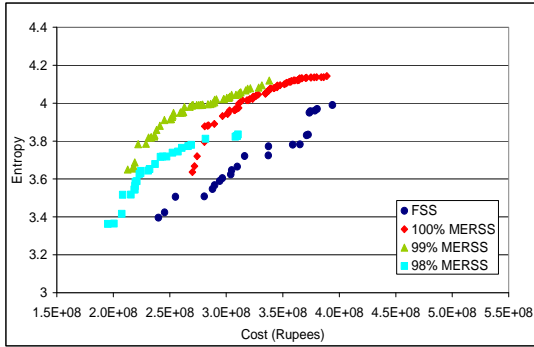

Run 13

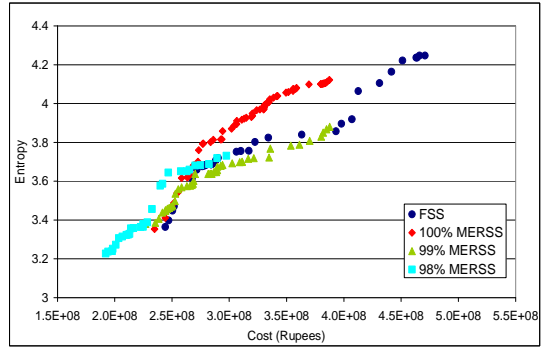

Run 14

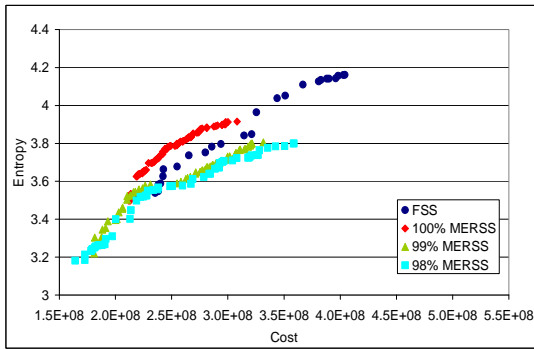

Run 15

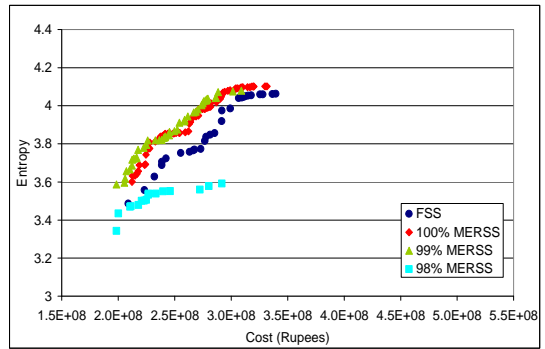

Run 16

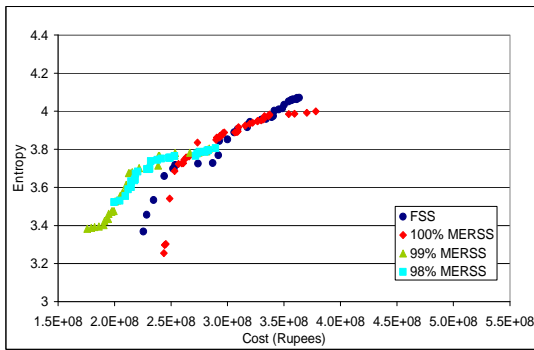

Run 17

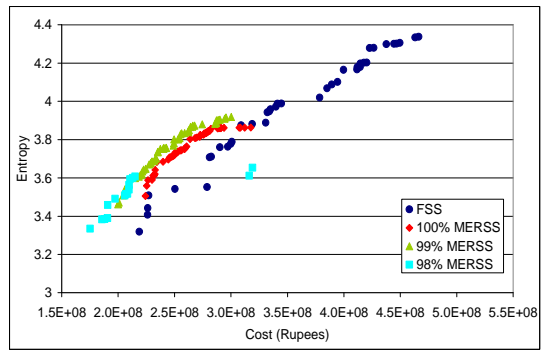

Run 18

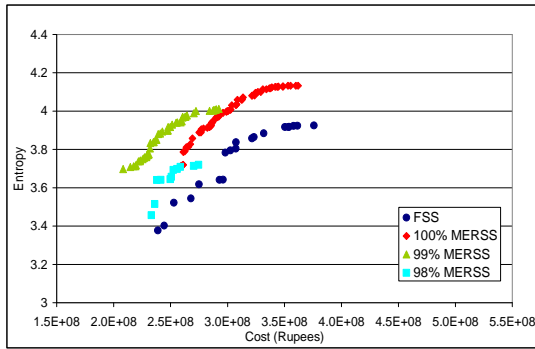

Run 19

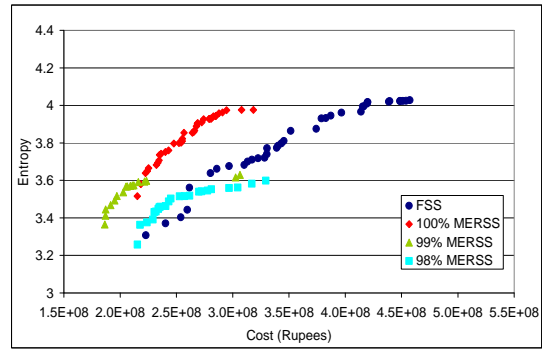

Run 20

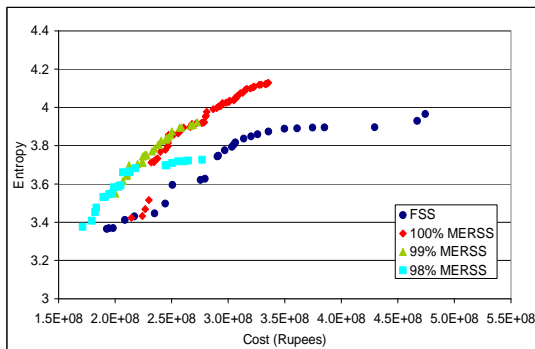

Run 21

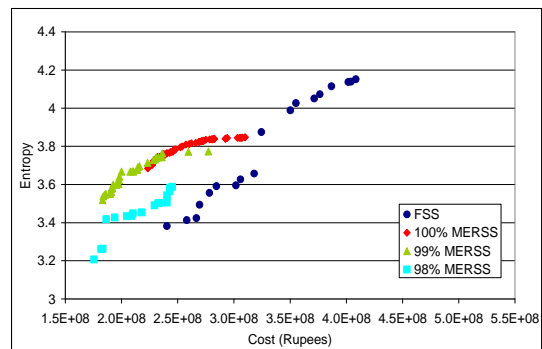

Run 22

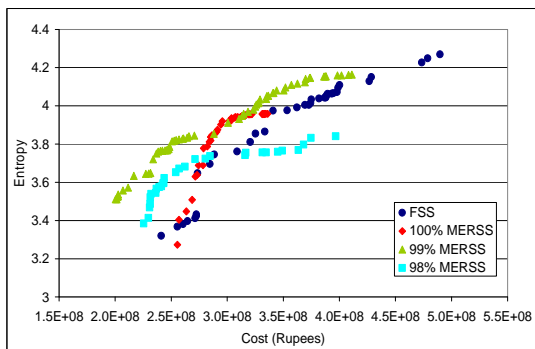

Run 23

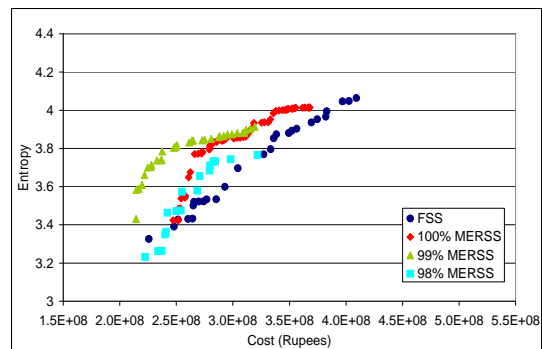

Run 24

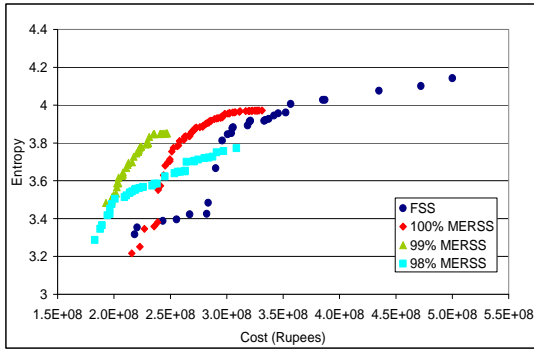

Run 25

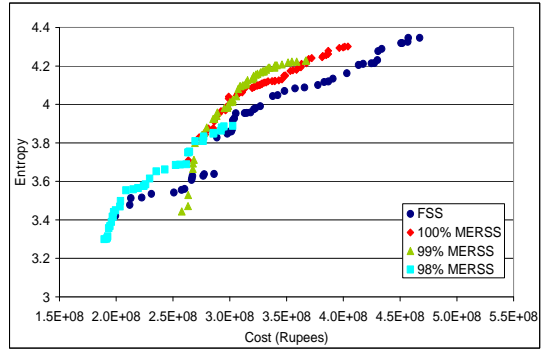

Run 26

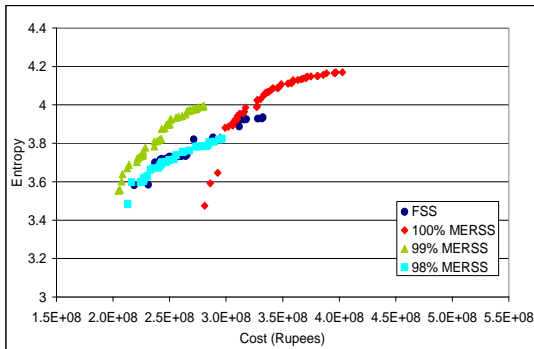

Run 27

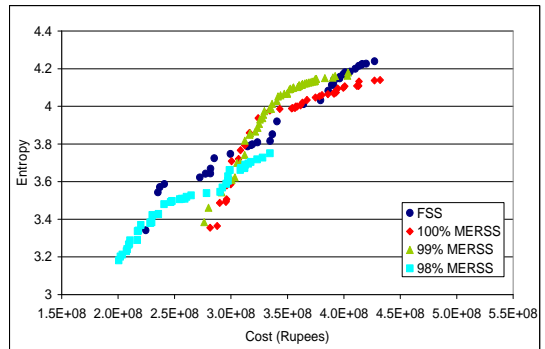

Run 28

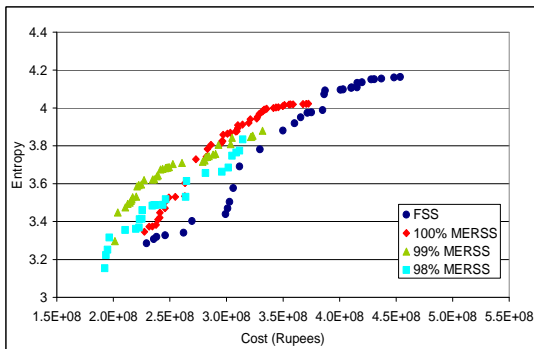

Run 29

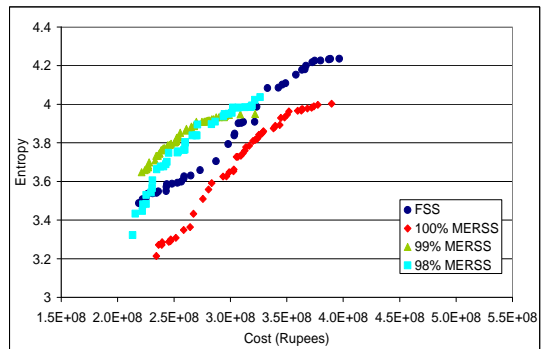

Run 30

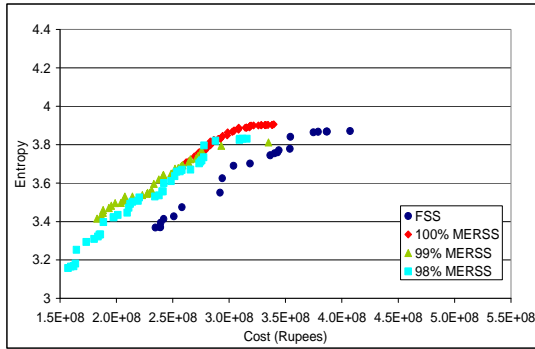

Run 31

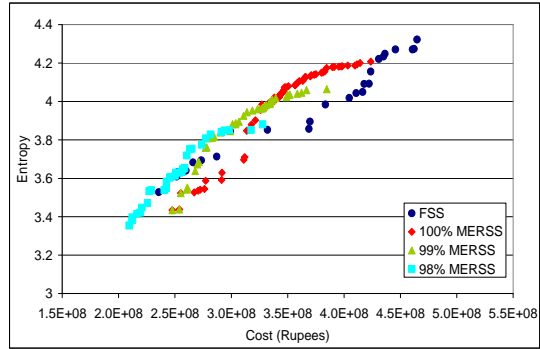

Run 32

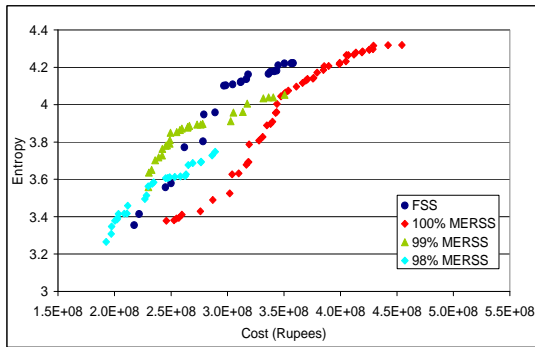

Run 33

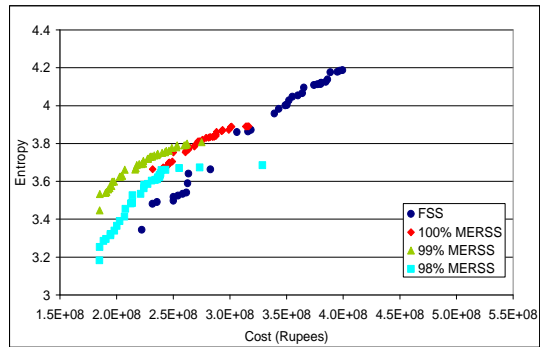

Run 34

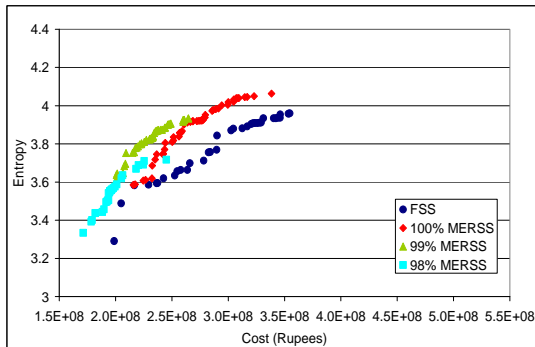

Run 35

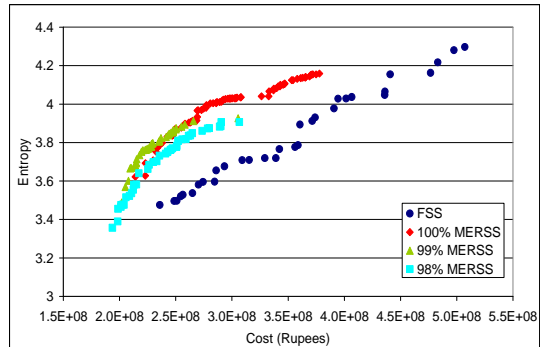

Run 36



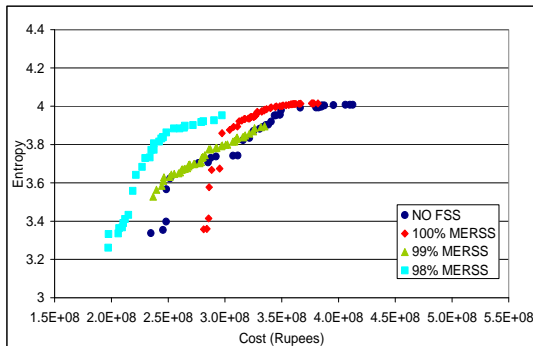

Run 37

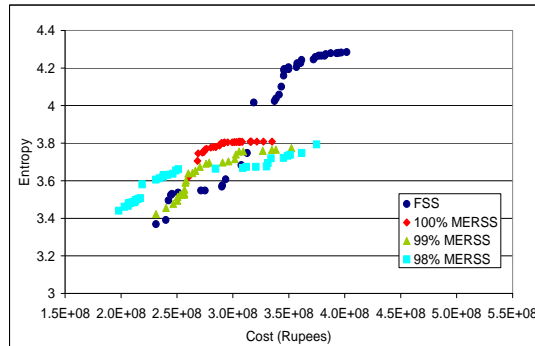

Run 38

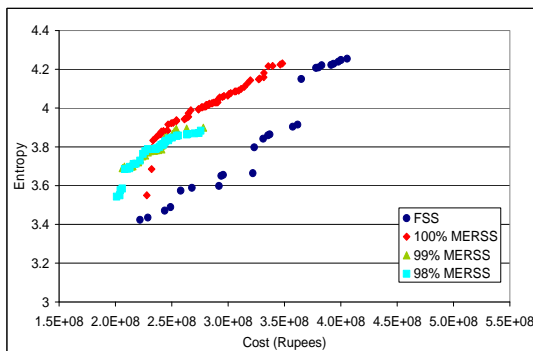

Run 39

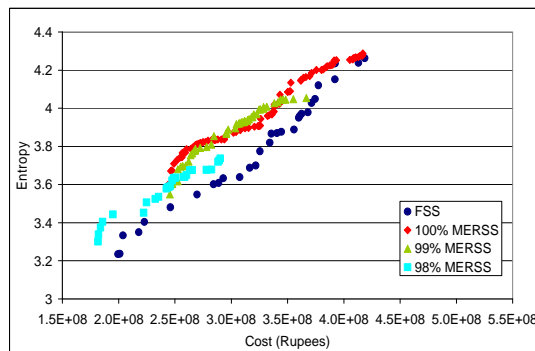

Run 40

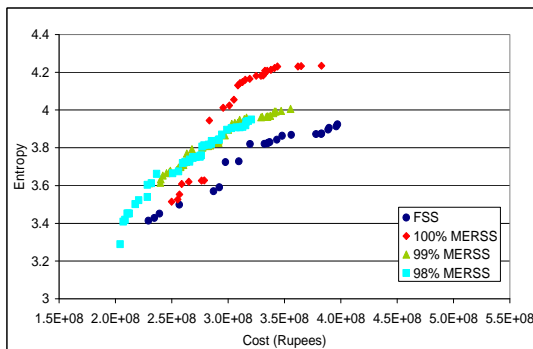

Run 41

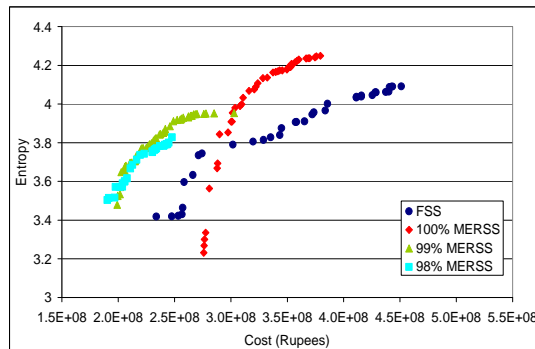

Run 42

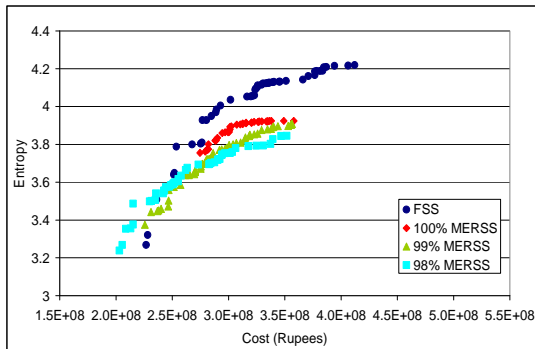

Run 43

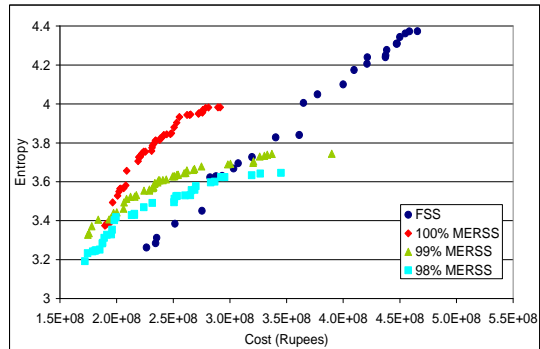

Run 44

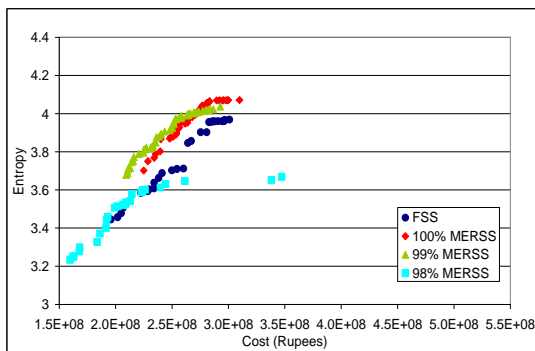

Run 45

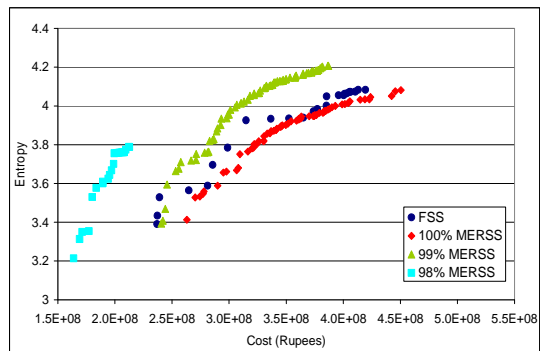

Run 46

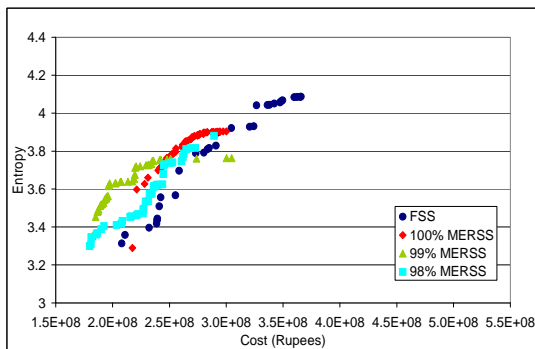

Run 47

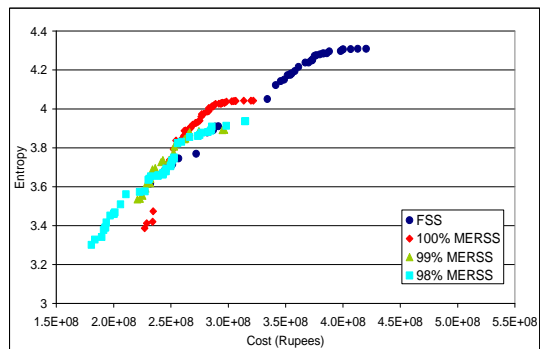

Run 48

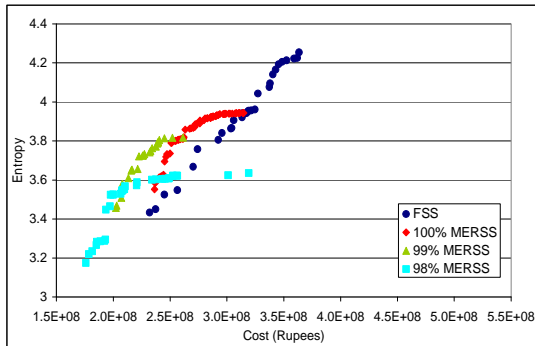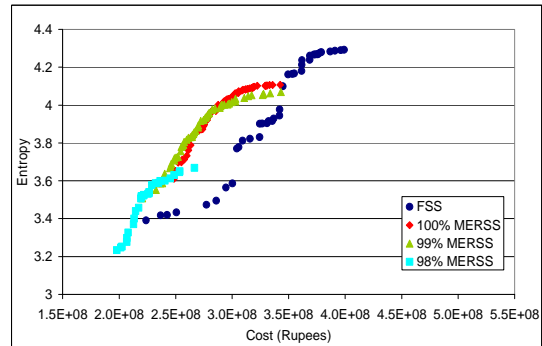

Figure A1 Pareto-optimal fronts of the independent optimization runs
